# Supplementary material for: Changes in the concentration of bone turnover markers in men after maximum intensity exercise
Source: PeerJ. 2024 May 17;12:e17258. doi: 10.7717/peerj.17258 (PMC11104338; doi:10.7717/peerj.17258)
Supplement: Data S1 — Changes in individual markers, body composition and physiological changes at the VT2 level. [file peerj-12-17258-s001.xlsx]

## Sheet: bone turnover markers 
25-OH-D					BALP						OC						NTX1					OPG					PINP
ID	before	after	unit		ID	before	after	unit			ID	before	after	unit			ID	before	after	unit		ID	before	after	unit		ID	before	after	unit
54A	32.7908	40.1766	ng/ml		54A	0.900781	0.644809	ng/ml			54A	1.29681	2.46639	ng/ml			54A	160.49	168.753	ng/ml		54A	0.0367437	0.129278	ng/ml		54A	3.40476	6.2746	ng/mL
55A	99.6266	105.864			55A	0.61419	0.583073				55A	1.88962	1.35447				55A	134.743	148.891			55A	0.0577624	0.0449505			55A	27.6509	30.386
56A	141.89	155.402			56A	0.371808	0.800944				56A	2.22145	3.09999				56A	78.8538	119.468			56A	0.298378	0.542386			56A	124.741	120.126
57A	93.9523	117.059			57A	0.534624	0.56423				57A	2.72106	3.34706				57A	146.517	155.049			57A	0.210885	0.297829			57A	46.6172	42.6612
58A	116.072	107.55			58A	0.404513	0.606438				58A	0.518254	4.45629				58A	115.896	108.757			58A	0.144947	0.179981			58A	61.1874	69.2979
59A	81.1279	112.592			59A	0.606884	0.979139				59A	1.86919	1.83782				59A	91.2395	113.092			59A	0.152333	0.241715			59A	78.8073	81.331
60A	28.2847	36.3301			60A	0.374367	0.628883				60A	8.98586	15.2682				60A	179.485	175.191			60A	3.3699	5.4173			60A	0	0
61A	112.626	140.732			61A	0.328197	0.450951				61A	0.826977	5.82657				61A	146.68	135.41			61A	0.0239518	0.0514959			61A	131.197	143.153
62A	145.673	146.641			62A	0.476446	0.352428				62A	0.478797	2.14131				62A	123.752	136.474			62A	0	0.046118			62A	130.473	134.297
63A	167.12	176.002			63A	0.4142	0.619623				63A	1.5009	3.61311				63A	90.6375	109.027			63A	0.0281338	0.0598369			63A	149.711	142.16
50A	162.031	124.182			50A	0.410196	0.774313				50A	2.87092	3.4849				50A	97.6302	133.702			50A	0.122785	0.108109			50A	143.021	143.009
51A	126.171	138.986			51A	0.441276	0.346443				51A	3.19348	3.96086				51A	96.8309	142.34			51A	0.234556	0.1709			51A	79.2995	79.1403
52A	112.051	134.225			52A	1.2566	0.795991				52A	2.14888	3.83863				52A	128.984	140.911			52A	0.17518	0.224778			52A	71.9539	69.4557
53A	164.861	163.138			53A	0.367162	0.465598				53A	2.59612	4.93568				53A	77.9651	112.793			53A	0.385268	0.441519			53A	135.632	139.128
6H1	74.7484	82.7691			6H1	0.296808	0.570931				6H1	26.6338	25.5707				6H1	171.405	174.818			6H1	13.2794	7.36967			6H1	12.8051	11.1519
7H1	155.176	155.591			7H1	0.212579	0.275877				7H1	15.7675	4.64529				7H1	111.504	121.073			7H1	0.0574653	65.8336			7H1	127.62	129.533
8H1	76.649	83.497			8H1	0.758733	0.758733				8H1	1.12016	1.94337				8H1	148.845	143.325			8H1	0.281827	0.325804			8H1	15.1627	21.0125
1H1	103.666	95.3867			1H1	0.565124	0.565124				1H1	3.62579	2.73433				1H1	153.841	156.187			1H1	0.394896	0.454632			1H1	45.2392	42.5215
2H1	105.649	94.7798			2H1	0.528086	0.528086				2H1	3.66391	4.74217				2H1	181.731	154.878			2H1	0.668441	0.820032			2H1	51.0693	44.8087
3H1	145.17	148.815			3H1	0.564141	0.564141				3H1	1.60684	3.11				3H1	101.432	115.332			3H1	0.18662	0.328023			3H1	113.559	104.662
4H1	102.215	111.422			4H1	0.441619	0.441619				4H1	2.00903	4.28505				4H1	111.668	116.261			4H1	0.35495	0.494157			4H1	73.6199	73.4075
5H1	176.625	175.031			5H1	0.364136	0.364136				5H1	0.767724	1.4219				5H1	86.1974	100.468			5H1	0.120187	0.0745609			5H1	141.841	142.579
70A	170.835	171.317			70A	0.662767	0.741197				70A	1.94872	3.05007				70A	92.071	101.67			70A	0.181299	0.14437			70A	122.897	119.865
71A	148.686	149.917			71A	0.43235	0.217413				71A	6.1127	2.99852				71A	128.459	137.759			71A	0.119809	0.0671875			71A	113.075	111.963
72A	116.424	127.435			72A	0.347312	0.284307				72A	1.14474	0.531031				72A	160.039	155.271			72A	0.188362	0.225551			72A	67.5578	68.8357
73A	115.167	107.277			73A	0.45105	0.367563				73A	3.44254	2.02064				73A	148.055	143.703			73A	0.873655	1.11047			73A	41.819	44.5319
74A	71.9502	92.3266			74A	1.57193	0.418764				74A	4.82597	2.21552				74A	137.434	126.186			74A	2.17674	2.55176			74A	32.8542	36.7765
75A	133.326	158.011			75A	0.510515	0.63182				75A	2.03185	1.47214				75A	98.0556	96.7837			75A	0.114645	0.158739			75A	134.362	143.202
76A	127.365	153.317			76A	0.93379	0.556276				76A	5.88856	3.5442				76A	121.009	104.953			76A	0.516503	0.591121			76A	117.489	126.233
77A	160.206	167.685			77A	0.305202	0.3799				77A	6.89316	1.39538				77A	124.25	110.166			77A	0.133406	0.0970438			77A	122.254	125.339
78A	164.264	171.379			78A	0.492954	0.418909				78A	11.1126	3.92831				78A	130.941	137.305			78A	3.16514	4.29726			78A	120.805	134.249
79A	159.416	141.006			79A	0.32139	0.32717				79A	7.79442	1.18794				79A	98.1658	90.9776			79A	0.0774087	0.0535909			79A	138.616	131.818
1/I/A	131.688	123.164			1/I/A	0.811821	0.499295				1/I/A	0	3.06049				1/I/A	104.231	116.74			1/I/A	0.137786	0.195245			1/I/A	88.2077	93.4056
2/I/A	150.481	142.499			2/I/A	0.341331	0.931937				2/I/A	1.34914	3.27283				2/I/A	93.5928	101.862			2/I/A	0.0338065	0.0758809			2/I/A	136.314	146.356
3/I/A	126.543	142.446			3/I/A	0.333137	0.640006				3/I/A	1.73234	1.53213				3/I/A	99.4146	115.217			3/I/A	0.354711	0.123775			3/I/A	110.637	122.173
4/I/A	118.482	121.266			4/I/A	1.56438	0.275053				4/I/A	1.3996	1.74158				4/I/A	152.352	153.525			4/I/A	0.136863	0.259857			4/I/A	72.319	79.069
6/I/A	155.399	153.324			6/I/A	0.678491	0.439759				6/I/A	1.80778	3.12456				6/I/A	77.1591	105.491			6/I/A	0.0469498	0.189137			6/I/A	141.32	131.626
7/I/A	155.549	163.72			7/I/A	1.78607	0.856893				7/I/A	1.6298	3.65873				7/I/A	73.7298	100.447			7/I/A	0.135161	0.199876			7/I/A	130.037	132.104
8/I/A	169.285	153.058			8/I/A	1.73783	0.351451				8/I/A	0.752554	4.0892				8/I/A	93.2718	86.6819			8/I/A	1.04667	0.122861			8/I/A	149.054	144.737
9/I/A	130.514	135.588			9/I/A	0.450815	0.467138				9/I/A	0.737449	0				9/I/A	93.7339	123.415			9/I/A	0.611204	0.0425498			9/I/A	126.095	118.931
10/I/A	94.2862	107.463			10/I/A	0.691097	0.793868				10/I/A	0.607429	0.672428				10/I/A	141.468	137.789			10/I/A	0.981821	1.12157			10/I/A	35.342	29.9405
5/I/A	141.798	117.212			5/I/A	0.971905	0.570752				5/I/A	1.70748	1.37853				5/I/A	93.4561	111.543			5/I/A	0.137766	0.0951746			5/I/A	128.791	112.804

## Sheet: body composition 
SERIES I											SERIES II
ID	BH [cm]	BM [kg]	BCM [kg]	FFM [kg]	FM [%]	FM [kg]	TBW [L]	TBW [%]	ECW [L]		BH [cm]	BM [kg]	BCM [kg]	FFM [kg]	FM [%]	FM [kg]	TBW [L]	TBW [%]	ECW [L]
54A	179.5	73.5	34	59.8	18.6395	13.7	43.7	59.4558	18.7		179.5	73.8	33.1	58.7	20.4607	15.1	42.9	58.1301	18.5
55A	186.5	73.8	30.9	58.3	21.0027	15.5	42.7	57.8591	19.8		186.5	71.9	31.5	58.9	18.0807	13	43.2	60.0834	19.9
56A	186.4	72.3	34.5	59.8	17.2891	12.5	43.6	60.3043	18.4		186.4	73.9	34.5	61.5	16.7794	12.4	45	60.8931	19.6
57A	186.2	76.9	34.1	63.9	16.9051	13	46.9	60.9883	21.6		186.2	76.8	36.7	68.2	11.1979	8.6	50.3	65.4948	22.9
58A	181.6	69.4	34.2	58.3	15.9942	11.1	42.5	61.2392	17.5		181.6	69.4	34.2	58.3	15.9942	11.1	42.5	61.2392	17.5
59A	184	94	38.7	68.9	26.7021	25.1	50.5	53.7234	22		184	95.6	37.5	70.1	26.6736	25.5	51.6	53.9749	23.7
60A	180	78.6	37.4	63.9	18.7023	14.7	46.7	59.4148	19.3		180	78.6	37.4	63.9	18.7023	14.7	46.7	59.4148	19.3
61A	183	73.6	37.7	64.4	12.5	9.2	47.2	64.1304	19.5		183	72.3	38.1	64.3	11.065	8	47.1	65.1452	19.2
62A	176	65	33.5	58.3	10.3077	6.7	42.7	65.6923	18.1		176	65	34.7	60	7.69231	5	44	67.6923	18.5
63A	183.5	81.8	37.6	67	18.0929	14.8	49.2	60.1467	21.4		183.5	81.8	37.6	67	18.0929	14.8	49.2	60.1467	21.4
50A	178	79.8	39.5	64	19.7995	15.8	46.6	58.396	18		178	80.9	39.3	65.8	18.665	15.1	48.1	59.4561	19.4
51A	183	81.7	39.3	68.8	15.7895	12.9	50.5	61.8115	21.6		183	80.8	39.3	67	17.0792	13.8	49.1	60.7673	20.3
52A	176.5	63.6	33.5	57	10.3774	6.6	41.6	65.4088	17.1		176.5	64.8	34.4	59.8	7.71605	5	43.8	67.5926	18.5
53A	184	77.7	40.1	64.9	16.4736	12.8	47.3	60.8752	18.2		184	77	40.4	66.4	13.7662	10.6	48.5	62.987	19
6H1	187.5	86.3									187	84.1
7H1	167	71.2									167	66.7
8H1	173	75.8									173	77.7
1H1	180	79.5									180.2	79.1
2H1	181	83.8									182	84.7
3H1	191	97.1									191.5	99.1
4H1	175.5	72.3									175.5	72.5
5H1	182	91									183	92.9
70A	179	77.5	36.8	61.4	20.7742	16.1	44.8	57.8065	18		179	79.1	38.5	65.6	17.067	13.5	48.1	60.8091	19.8
71A	169.5	67.1	33.8	56.5	15.7973	10.6	41.2	61.4009	16.6		169.5	66.3	35.3	57.8	12.8205	8.5	42.1	63.4992	16.5
72A	187.5	78.1	38.9	68.2	12.6761	9.9	50.1	64.1485	21.4		187.5	77.1	39.4	69.6	9.72763	7.5	51.2	66.4073	22
73A	187	95.9	49	83.4	13.0344	12.5	61.5	64.1293	25.3		187	97.2	50.7	84.6	12.963	12.6	62.4	64.1975	25.1
74A	172.5	73.6	35.8	60.4	17.9348	13.2	44.1	59.9185	18		172.5	72.5	37.9	62.2	14.2069	10.3	45.4	62.6207	17.8
75A	175.5	70.6	37.9	63.4	10.1983	7.2	46.4	65.7224	18.7		175.5	70.4	41.3	65.3	7.24432	5.1	47.7	67.7557	17.8
76A	179.5	74	36.6	62.5	15.5405	11.5	45.7	61.7568	18.9		179.5	73.1	36	61.8	15.4583	11.3	45.2	61.8331	18.8
77A	171.5	69.1	35.2	59.4	14.0376	9.7	43.4	62.8075	17.7		171.5	69.2	36.1	59.5	14.0173	9.7	43.4	62.7168	17.1
78A	176	83.8	46.6	72.6	13.3652	11.2	53.1	63.3652	19.4		176	85.3	46.2	76.1	10.7855	9.2	56	65.6506	22
79A	173	71.1	39.8	65.6	7.73558	5.5	48.1	67.6512	19		173	71.1	39.8	65.6	7.73558	5.5	48.1	67.6512	19
1/I/A	178	73	38.8	65.3	10.5479	7.7	47.8	65.5	19.4		178	74	36.7	64.9	12.2973	9.1	47.7	64.4595	20.6
2/I/A	178	73	38.8	65.3	10.5479	7.7	47.8	65.5	19.4		178	72.6	40.7	67.9	6.47383	4.7	49.8	68.595	20
3/I/A	184.5	78	39.7	66.2	15.1282	11.8	48.4	62.1	19.4		184.5	78.4	41.9	69.7	11.0969	8.7	51.1	65.1786	20.5
4/I/A	187	78	40.4	66.2	15.1282	11.8	48.3	62	19		187	78	38.9	65.6	15.8974	12.4	48	61.5385	19.6
6/I/A	177	76.5	35.8	64	16.3399	12.5	47	61.5	20.5		177	76.5	35.8	64	16.3399	12.5	47	61.4379	20.5
7/I/A	173	80	39.1	68.6	14.25	11.4	50.5	63.1	21.6		173	78.4	39.7	66.8	14.7959	11.6	49	62.5	19.8
8/I/A	190	97	47.5	81.8	15.6701	15.2	60.4	62.2	25.3		190	95	47.7	80.1	15.6842	14.9	59	62.1053	23.8
9/I/A	191.5	74.6	38.8	69.1	7.37265	5.5	50.8	68.1	22.1		191.5	74.9	40	69.9	6.67557	5	51.4	68.6248	21.9
10/I/A	178.5	74.5	44.9	71.7	3.75839	2.8	52.6	70.7	19.9		178.5	77.5	46.5	72.6	6.32258	4.9	53.1	68.5161	19.4
5/I/A	172	68.2	38.1	64.1	6.01173	4.1	47.1	69.1	19.1		172	67.6	37.8	61.7	8.72781	5.9	45.1	66.716	17.5
AVERAGE	180.136	77.4357	38.1559	65.0882	14.5419	11.2441	47.6706	62.5868	19.7029		180.188	77.4667	38.6941	65.9176	13.4795	10.4588	48.3176	63.4068	19.9176
SD	5.98199	8.11383	4.00244	5.95363	4.62434	4.19749	4.49186	3.46497	1.99992		6.00449	8.47106	4.1121	5.91928	4.65207	4.29857	4.46018	3.4244	1.97133
min	167	63.6	30.9	56.5	3.75839	2.8	41.2	53.7234	16.6		167	64.8	31.5	57.8	6.32258	4.7	42.1	53.9749	16.5
max	191.5	97.1	49	83.4	26.7021	25.1	61.5	70.7	25.3		191.5	99.1	50.7	84.6	26.6736	25.5	62.4	68.6248	25.1

## Sheet: physiology
ID	MAX t [min]	v [km/h]	HR [sk/min]	VO2 [L∙min-1]	VO2/kg	Ve [l/min]	VT2 t [min]	v [km/h]	HR [sk/min]	VO2 [L∙min-1]	VO2/kg	Ve [l/min]	II ventilation threshold%VO2max	II ventilation threshold %HR	Lactate 0	Lactate 3	Lactate 20
54A	19.3	17.5	176	3.89	52.9252	158.8	12	12.9	155	3.1	42.1769	97.3	79.6915	88.0682	1.49	13	7.56
55A	16.3	15.3	181	3.75	50.813	162.5	10	11.8	166	3.32	44.9864	121.4	88.5333	91.7127	1.41	12.4	6.9
56A	16.3	15.2	185	3.63	50.2075	139.3	11	12.2	168	3.24	44.8133	94	89.2562	90.8108	1.81	12.4	6.44
57A	19	16.7	177	4.36	56.697	194.4	10	11.8	160	3.53	45.9038	120	80.9633	90.3955	1.57	10.9	5.07
58A	19	17.7	185	3.83	55.1873	177.1	11.3	12.8	169	3.24	46.6859	88.5	84.5953	91.3514	1.71	14	8.08
59A	11	10.3	174	4.13	43.9362	142.9	9.3	10.8	161	3.87	41.1702	112.9	93.7046	92.5287	1.58	13.3	8.46
60A	18	16.2	187	3.9	49.6183	159.4	14.3	14.2	175	3.55	45.1654	121.7	91.0256	93.5829	1.58	9.24	5.69
61A	22.3	19.2	189	4.47	60.7337	184.9	14.3	14.8	172	3.95	53.6685	122.1	88.3669	91.0053	1.03	6.91	1.13
62A	19	16.7	203	3.69	56.7692	127.6	10	11.8	172	2.71	41.6923	73.3	73.4417	84.7291	1.45	12	3.48
63A	16.3	16.4	183	3.84	46.9438	155.8	10.3	12.7	169	3.4	41.5648	108.7	88.5417	92.3497	1.42	8.37	4.48
50A	16	15.1	179	3.84	48.1203	149.9	8	10.7	162	3.09	38.7218	96.3	80.4687	90.5028	1.47	14.2	6.25
51A	16.3	15.3	190	3.88	47.4908	140	10	11.9	156	3.16	38.6781	78	81.4433	82.1053	1.75	16.6	8.54
52A	22.3	19.2	183	3.76	59.1195	157	11.3	11.1	169	3.36	52.8302	115.8	89.3617	92.3497	1.61	12.1	4.65
53A	16.3	14	196	3.88	49.9356	143.3	10	9	173	2.85	36.6795	89.9	73.4536	88.2653	1.41	11.4	8.1
6H1		15.5	158	4.25	50.5351	134.8		14.3	151	4.23	49.0151	133.8	96.9922	95.5696
7H1		14.3	181	3.67	55.0225	131		15.4	186	3.18	44.6629	141	81.1721	102.762
8H1		14.2	189	3.76	48.3912	134.9		15.5	181	3.6	47.4934	148.4	98.1446	95.7672
1H1		15.4	178	3.72	47.0291	151.6		14.2	171	3.37	42.3899	137.1	90.1356	96.0674
2H1		16.6	195	4.53	53.4829	164.8		16.6	192	4.2	50.1193	164	93.711	98.4615
3H1		16.6	178	4.88	49.2432	180.2		16.6	170	4.81	49.5366	184.6	100.596	95.5056
4H1		15.6	188	3.75	51.7241	124		16.7	187	3.72	51.4523	145.9	99.4744	99.4681
5H1		14.2	176	4.05	43.5953	145		13	163	4.03	44.2857	121.1	101.584	92.6136
70A	13.3	13.7	188	2.87	37.0323	125.6	10	11.7	179	2.6	33.5484	78.8	90.5923	95.2128	1.58	17	12.2
71A	13.3	13.7	198	2.87	42.772	125.6	12	11.2	179	2.6	38.7481	78.8	90.5923	90.404	1.58	17	12.2
72A	19.16	15.7	178	5.12	65.557	158.2	12.3	11.5	156	4.04	51.7286	96	78.9063	87.6404	1.43	13.3	7.23
73A	15.3	14.8	179	3.17	33.0553	148.3	14.1	14.3	171	2.52	26.2774	82.7	79.4953	95.5307	1.64	14.2	6.1
74A	19.68	17.5	172	4.29	58.288	166	11.3	11.5	149	3.8	51.6304	99.2	88.5781	86.6279	1.86	13.8	6.6
75A	18	16.1	184	3.91	55.3824	172.3	11.3	12.6	162	3.07	43.4844	102.3	78.5166	88.0435	1.59	15.4	9.46
76A	18	16.1	188	4.41	59.5946	177.3	13	12.3	178	3.44	46.4865	102.5	78.0045	94.6809	1.39	12	4.6
77A	19.3	16.4	200	3.85	55.7164	145.9	11	12.3	177	3.02	43.7048	92.4	78.4416	88.5	1.58	14.4	6.55
78A	21	17.7	191	4.4	52.506	169	13.3	12.6	160	3.14	37.4702	77.5	71.3636	83.7696	1.39	12	4.6
79A	15.3	14.8	199	3.41	47.9606	137.7	9	11.2	178	2.8	39.3812	91.6	82.1114	89.4472	1.53	12.7	8.31
1/I/A	16.3	14.3	179	3.72	50.9589	116.9	9.3	10.6	153	3.1	42.4658	68	83.3333	85.4749	1.59	8.99	5.11
2/I/A	18.3	15.5	193	3.81	52.1918	149	10.3	11	163	2.91	39.863	81.8	76.378	84.456	1.39	9.33	4.89
3/I/A	12	11.9	182	3.47	44.4872	100.6	7	9.1	171	3	38.4615	77.9	86.4553	93.956	1.39	13.9	4.99
4/I/A	14.3	13.2	191	3.28	42.0513	143.4	9.3	10.5	171	2.81	36.0256	97.5	85.6707	89.5288	1.86	12.8	5.66
6/I/A	18	15.2	220	4.34	56.732	154.7	9	10.2	177	3.06	40	75.5	70.5069	80.4545	1.35	8.11	3.66
7/I/A	12.3	12.1	153	5.3	66.25	176		10.7	179	5.06	63.25	100.2	95.4717	116.993	1.66	14.3	7.89
8/I/A	18.3	15.4	180	3.84	39.5876	144.9	8	9.7	156	2.77	28.5567	77.4	72.1354	86.6667	1.38	12.8	4.76
9/I/A	16.3	14.3	192	4.13	55.3619	137.9	9.3	10.6	169	3.37	45.1743	87.1	81.5981	88.0208	1.44	11.8	5.17
10/I/A	15.3	14.8	192	4.47	60	187.2	9	11.1	175	3.74	50.2013	116.3	83.6689	91.1458	1.49	13.9	7.76
5/I/A	19	16	195	4.52	66.2757	157.3	13	13.5	180	3.8	55.7185	93.4	84.0708	92.3077	1.55	15.6	7.18
AVERAGE	17.0541	15.3905	185.357	3.96762	51.6496	151.262	10.7061	12.3571	169.31	3.38476	43.9493	104.588	85.2511	91.5437	1.52824	12.6515	6.46324
SD	2.70483	1.74694	11.3133	0.506537	7.32539	20.0621	1.82921	1.9435	10.0059	0.561237	6.96412	26.076	8.07567	6.06851	0.161745	2.44079	2.24802
min	11	10.3	153	2.87	33.0553	100.6	7	9	149	2.52	26.2774	68	70.5069	80.4545	1.03	6.91	1.13
max	22.3	19.2	220	5.3	66.2757	194.4	14.3	16.7	192	5.06	63.25	184.6	101.584	116.993	1.86	17	12.2
